# Supplementary material
Source: HighWire-hosted journal article supplement (https://openres.ersjournals.com/content/6/2/00298-2019)
Supplement: inline-supplementary-material-1 [file inline-supplementary-material-1.pdf]

## DATA SUPPLEMENT

---

### SUBJECT CHARACTERISTICS

Exclusion of the 8 subjects with a baseline FEV<sub>1</sub> of under 70% of predicted provides the following demographic and clinical parameters (Supplement Table 1). Exclusion means that the conditions the power calculation provided (n = 17 for both groups) are no longer met.

| <i>Characteristics</i>                           | <b>Non-EIB (n=22)</b> | <b>EIB (n=12)</b>  | <b>Significance<br/>(P value)</b> |
|--------------------------------------------------|-----------------------|--------------------|-----------------------------------|
| <i>Age (years)</i>                               | 12.3 (3.0)            | 12.8 (3.3)         | 0.64                              |
| <i>Height (cm)</i>                               | 153.2 (19.4)          | 154.5 (20.9)       | 0.92                              |
| <i>Weight (kg)</i>                               | 48.8 (21.7)           | 48.3 (16.2)        | 0.91                              |
| <i>Male (%)</i>                                  | 87(34)                | 92(29)             | 0.66                              |
| <i>Inhalation allergies? (%)</i>                 | 83(39)                | 67(49)             | 0.33                              |
| <i>ICs usage? (%)</i>                            | 52(51)                | 67(49)             | 0.36                              |
| <i>FEV<sub>1</sub> predicted at baseline (%)</i> | 93 (10)               | 90 (10)            | 0.36                              |
| <i>FEV<sub>1</sub> decrease (%)</i>              | 7.1 (3.9)             | 26.4 (15.3)        | <b>&lt; 0.001</b>                 |
| <i>Peak amplitude EMG (μV)</i>                   | 1.72 (0.97-2.62)      | 1.72 (0.96 – 2.11) | 0.77                              |
| <i>Peak width (s)</i>                            | 3.35 (2.72 – 3.68)    | 2.94 (2.14 – 3.66) | 0.52                              |
| <i>Area under curve</i>                          | 2.63 (1.43 – 3.90)    | 3.67 (1.19 – 6.37) | 0.54                              |
| <i>Tonic activity (μV)</i>                       | 1.62 (1.39 – 2.04)    | 1.95 (1.52 – 2.43) | 0.21                              |

**Supplement Table 1: Demographic and clinical parameters of the study population. Data is displayed as mean ( $\pm$ SD) with corresponding p-value, or as a percentage. Measured EMG parameters are displayed as median (IQR), significant differences are displayed in bold print.**

## CORRELATION

There was a very strong correlation between the decrease in FEV<sub>1</sub> and the increase in peak amplitude of the diaphragm, a Spearman's rho of 0.82 was found (Supplement Figure 1).

## GROUP COMPARISON

EMG parameters at the diaphragm were comparable between groups at baseline (Supplement Figure 2). At the nadir FEV<sub>1</sub> we found a significant increase in peak amplitude and area under curve (Supplement Table 1).

|                                       | Non-EIB (n=22)          | EIB (n=12)           | P-value           |
|---------------------------------------|-------------------------|----------------------|-------------------|
| $\Delta$ Peak amplitude ( $\mu$ V)    | 0.20 (-0.10 - 0.54)     | 3.01 (1.82 - 7.74)   | <b>&lt; 0.001</b> |
| $\Delta$ Peak width (s)               | -0.68 (-1.10 - (-0.54)) | 0.09 (-0.56 - 1.45)  | 0.05              |
| $\Delta$ AUC ( $\mu$ Vs)              | -0.25 (-0.87 - 0.47)    | 3.91 (0.65 - 14.10)  | <b>&lt; 0.01</b>  |
| $\Delta$ Baseline activity ( $\mu$ V) | 0.21 (-0.52 - 0.72)     | -0.32 (-1.12 - 0.31) | 0.37              |

**Supplement Table : Overview of the increases in measured EMG parameters between baseline and at the nadir FEV1. All data is displayed as a median (IQR) with the corresponding P-value, significant differences are displayed in bold print.**

It is possible to distinguish between EIB and non-EIB using the difference in peak amplitude with a sensitivity of 92% and a specificity of 91% at a cut-off value of 1.15 $\mu$ V. The area under curve of the ROC curve was 0.96 (Supplement Figure 3). The measure area under curve allows to distinguish between EIB and non-EIB with a sensitivity of 75% and a specificity of 91% using a cut-off value of 1.57 $\mu$ Vs. The area under curve of the ROC curve is 0.80 (Supplement Figure 3).
