# Supplementary material
Source: HighWire-hosted journal article supplement (https://openres.ersjournals.com/content/6/2/00298-2019)

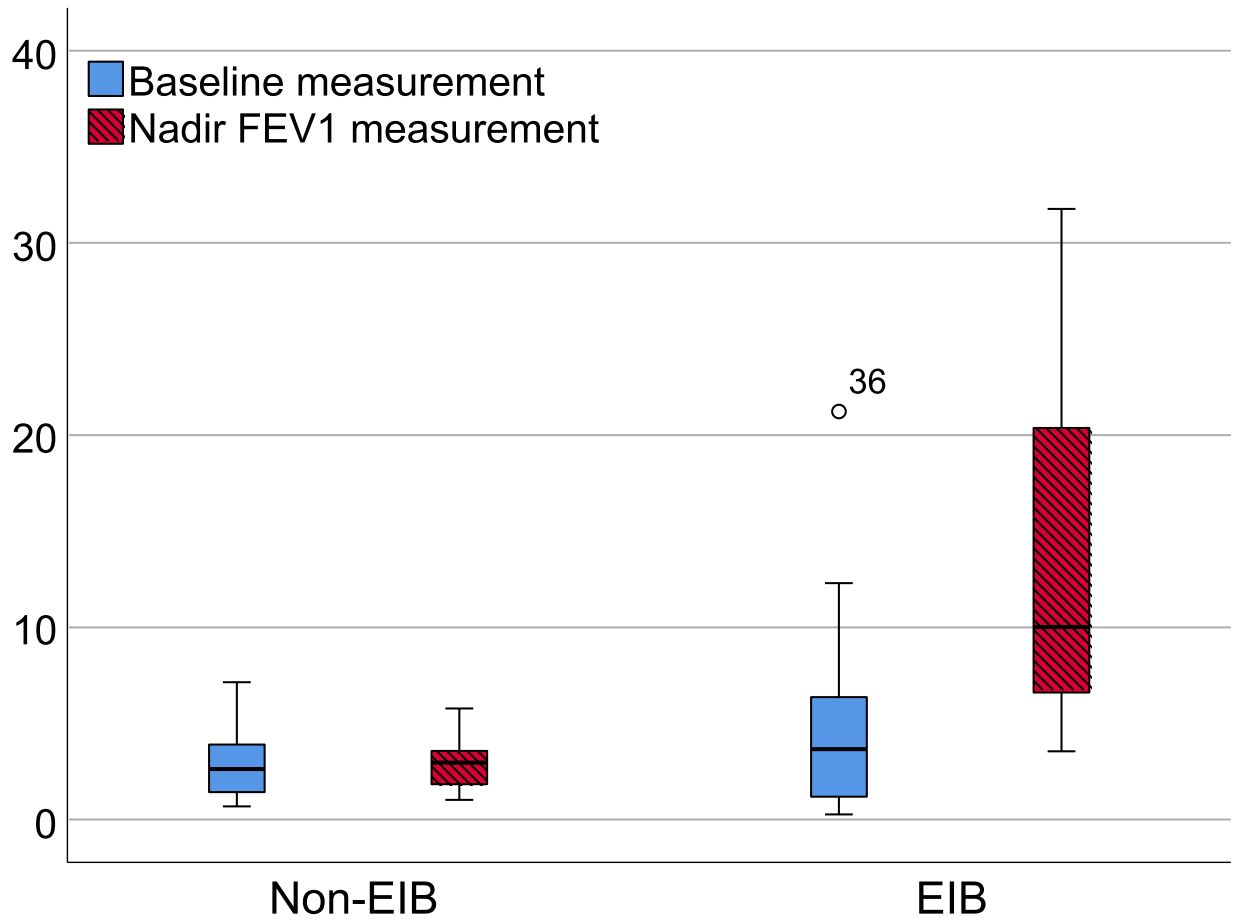

Supplement: inline-supplementary-material-4 [file inline-supplementary-material-4.pdf]

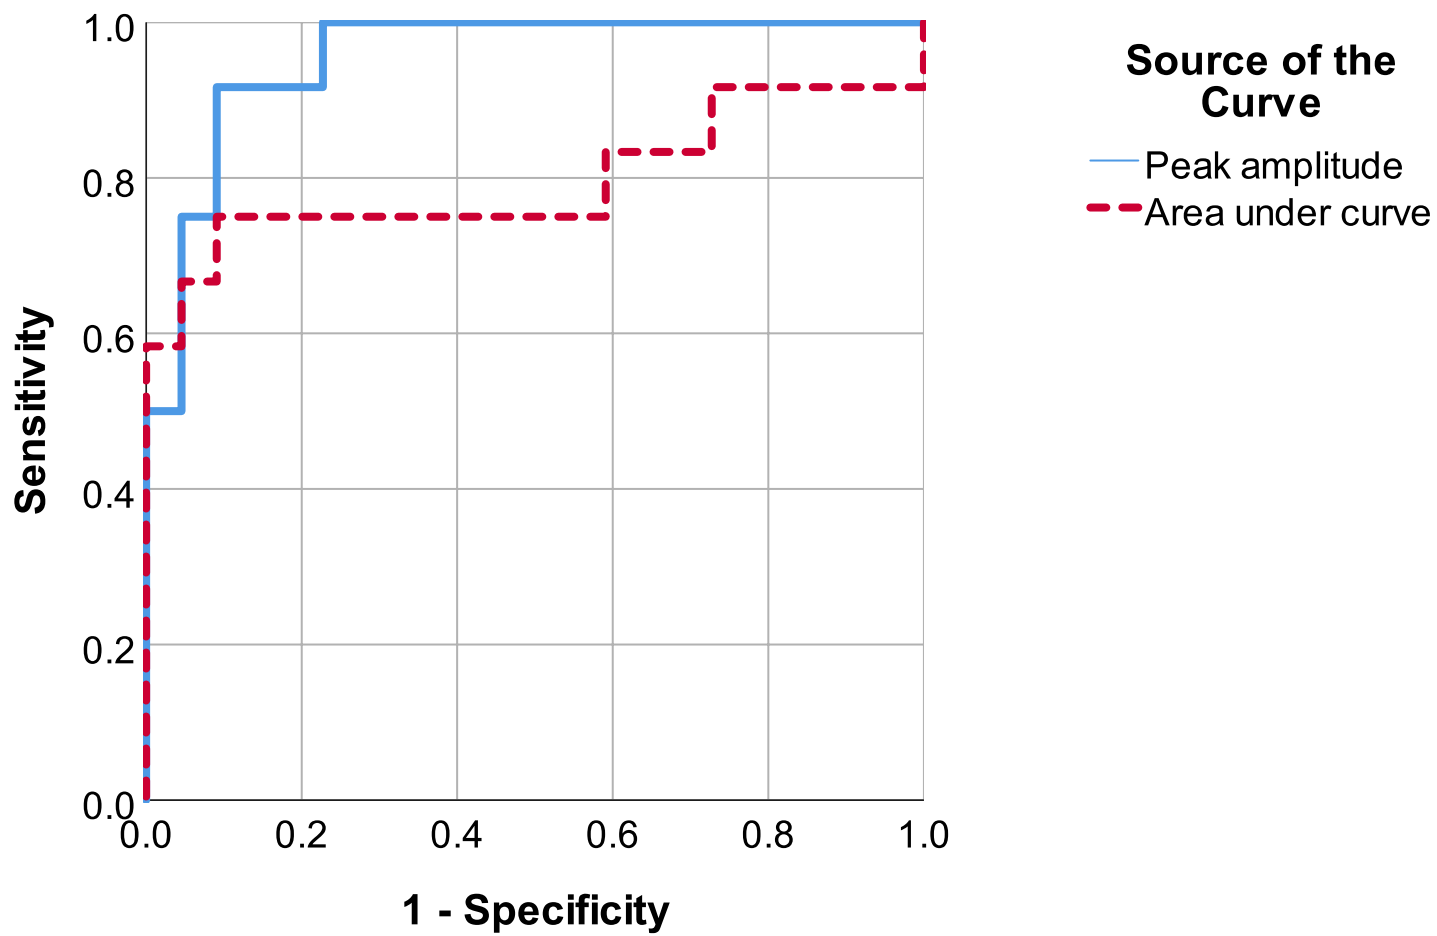

Supplement: inline-supplementary-material-5 [file inline-supplementary-material-5.pdf]
